# Supplementary material for: Kidney-Specific CAP1/Prss8-Deficient Mice Maintain ENaC-Mediated Sodium Balance through an Aldosterone Independent Pathway
Source: MDPI journal article supplement (doi:10.3390/ijms23126745), 2022-06-16
Supplement: s1 [file s1]

## Appendix A

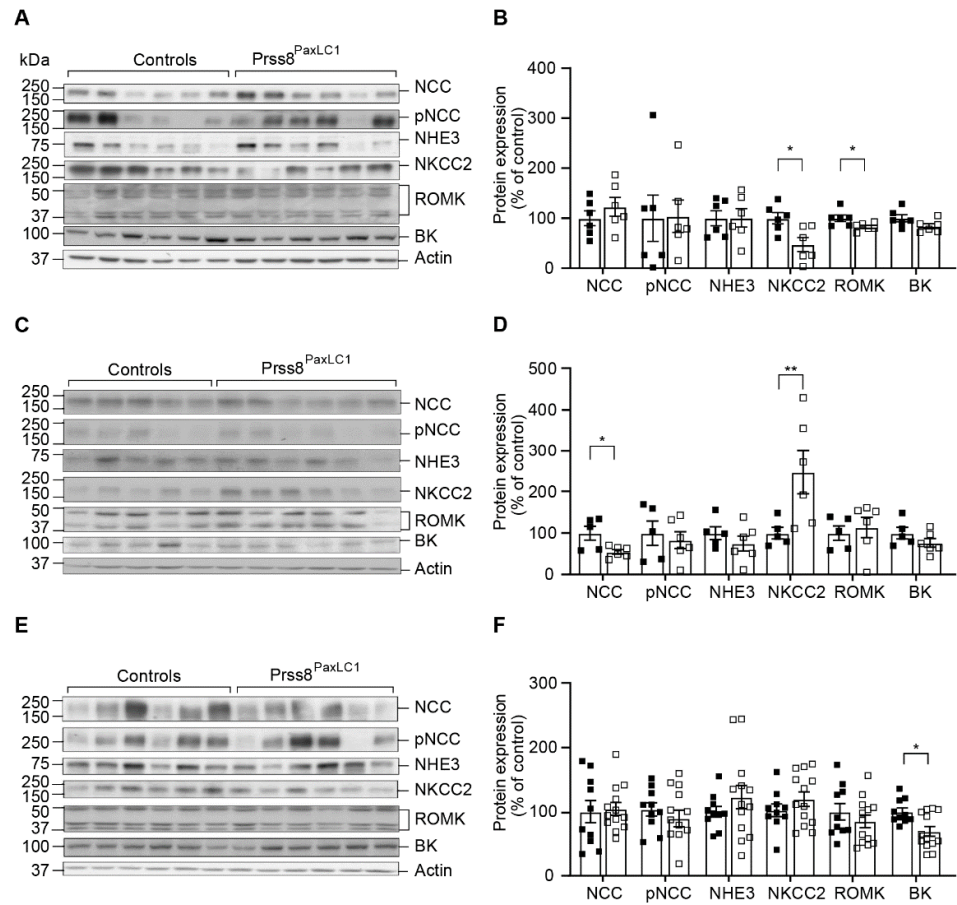

**Figure S1. In *Prss8<sup>PaxLC1</sup>* Ko mice, NKCC2 and ROMK protein expression levels were significantly reduced under standard, increased under high (only NKCC2) and not different on low Na<sup>+</sup> diet. Western blot analyses of NCC, pNCC (pT53-NCC), NHE3, NKCC2, ROMK and BK on kidney lysates from control and *Prss8<sup>PaxLC1</sup>* Ko mice under (A) standard, (C) high and (E) low Na<sup>+</sup> diet;  $\beta$ -actin was used as loading control. (B,D,F) Quantification of data. Values are mean  $\pm$  SEM and datasets were analyzed by an unpaired two-tailed *t* test. *P* values <0.05 were considered statistically significant. \**P* < 0.05, \*\**P* < 0.01.**

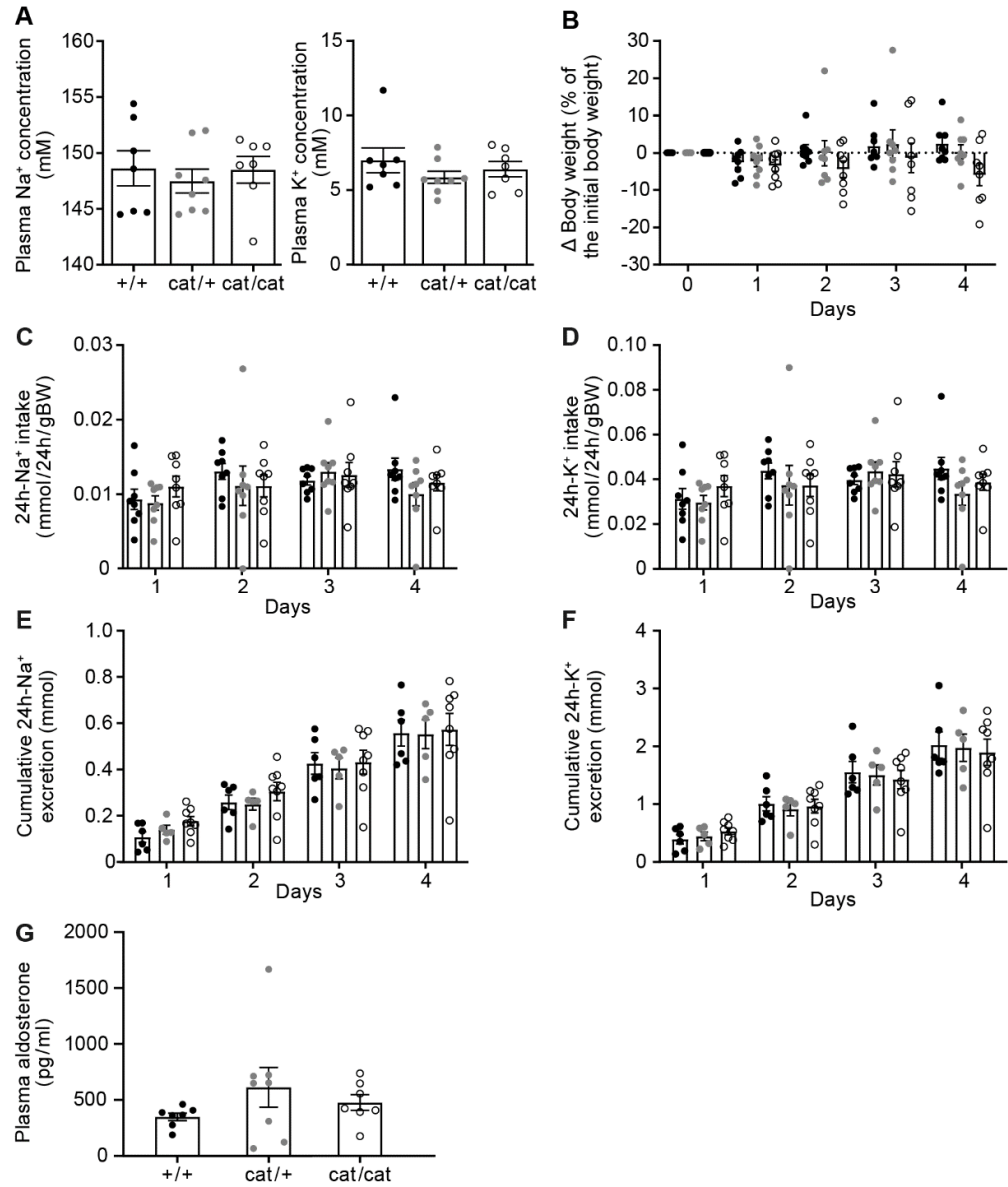

**Figure S2. Under standard diet, heterozygous and homozygous mutant *Prss8*<sup>cat</sup> mice displayed normal Na<sup>+</sup> and K<sup>+</sup> handling.** (A) Plasma Na<sup>+</sup> and K<sup>+</sup> (mM) concentrations in control, heterozygous and homozygous *Prss8*<sup>cat</sup> mice. (B) Body weight changes (expressed as percent of initial body weight), (C) 24h Na<sup>+</sup> and (D) K<sup>+</sup> (mmol/24h/gBW) intake and, (E) 24h cumulative Na<sup>+</sup> and (F) K<sup>+</sup> excretion (mmol/24h/gBW). (G) Plasma aldosterone levels. (+/+ n=7, *Prss8*<sup>cat/+</sup> n= 8, *Prss8*<sup>cat/cat</sup>, n=7). Results are presented as mean ± SEM. A and G were analyzed with a one-way ANOVA with a Tukey test. B-F were analyzed with a two-way ANOVA. *P* values <0.05 were considered statistically significant.

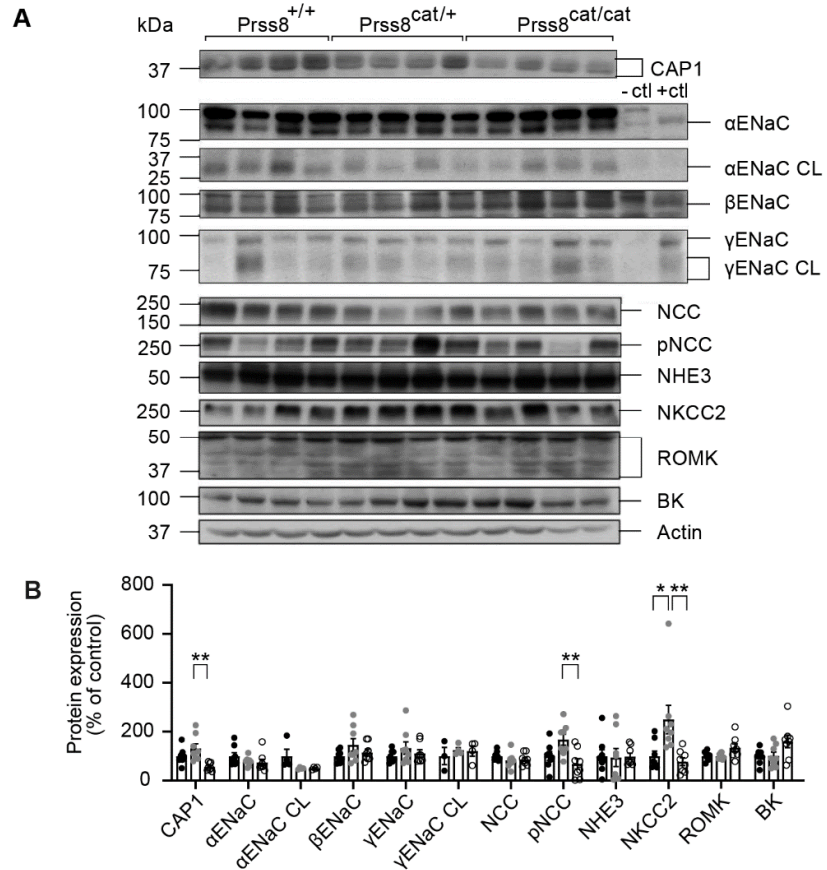

**Figure S3. Under standard diet, heterozygous mutant *Prss8<sup>cat/+</sup>* mice exhibited increased CAP1/*Prss8*, pNCC and NKCC2 protein expression levels.** (A) Representative Western blot analyses of CAP1/*Prss8*, αENaC, αENaC CL (cleaved), βENaC, γENaC, γENaC CL (cleaved), βENaC, γENaC, γENaC CL (cleaved), NCC, pNCC (pT53-NCC), NHE3, NKCC2, ROMK and BK on kidney lysates from wild-type (+/+), heterozygous (*Prss8<sup>cat/+</sup>*) and homozygous mutant *Prss8<sup>cat/cat</sup>* (n=8 per genotype) littermates; β-actin was used as loading control. Kidney lysates from αENaC [9], βENaC and γENaC [7],[8] control and renal tubular-specific knockouts were used as negative (-ctl) and positive (+ctl) control. (B) Quantification of Western blots. Values are mean ± SEM and datasets were analyzed by a one-way ANOVA with a Tukey test. P values <0.05 were considered statistically significant. \*P <0.05, \*\*P <0.01.

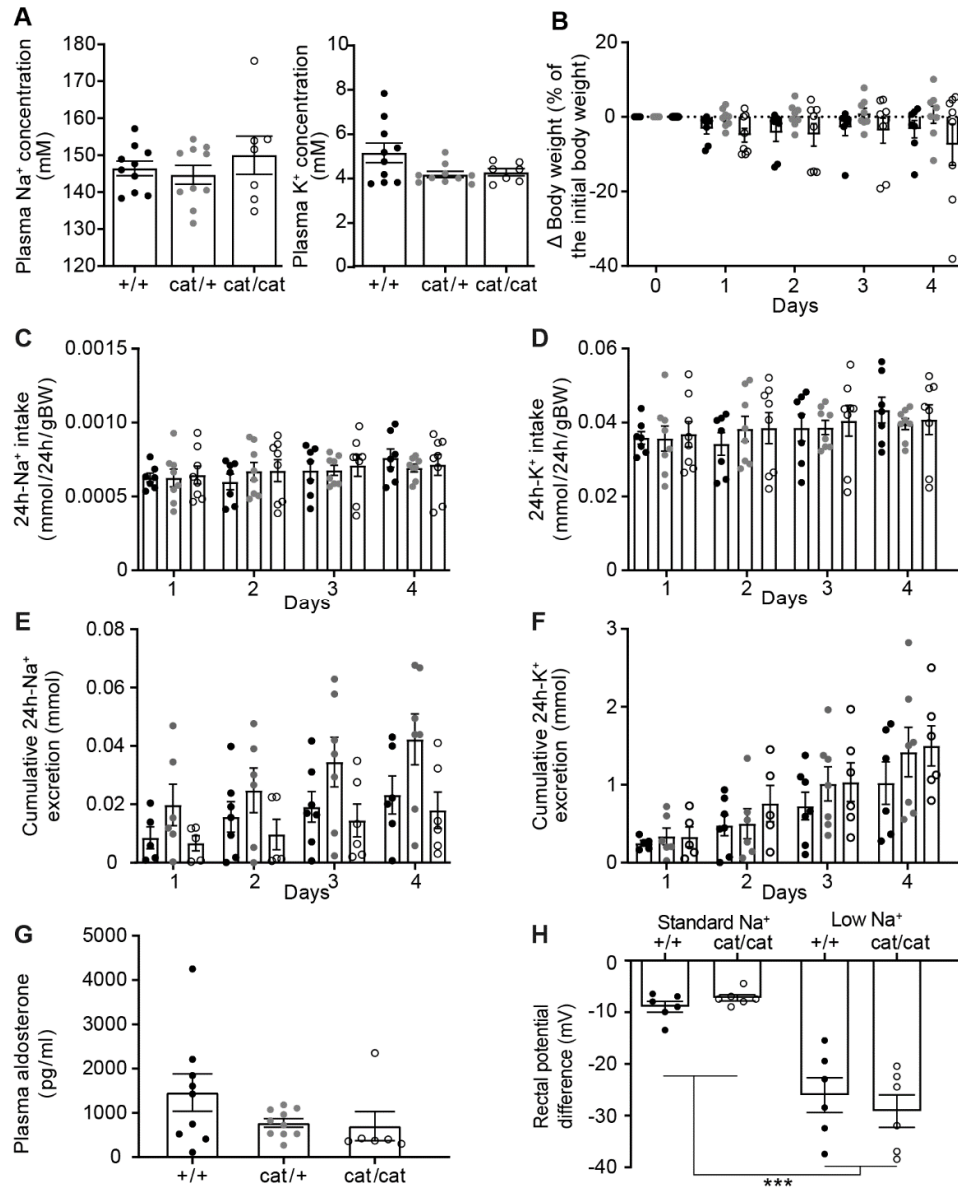

**Figure S4. Under low Na<sup>+</sup> diet, heterozygous (*Prss8<sup>cat/+</sup>*) and homozygous mutant *Prss8<sup>cat/cat</sup>* mice displayed normal Na<sup>+</sup> and K<sup>+</sup> handling.** (A) Plasma Na<sup>+</sup> and K<sup>+</sup> (mM) concentrations in control, heterozygous and homozygous *Prss8<sup>cat</sup>* mice (B) Body weight changes (expressed as percent of initial body weight) (C) 24h Na<sup>+</sup> and (D) K<sup>+</sup> (mmol/24h/gBW) intake and (E) 24h cumulative Na<sup>+</sup> and (F) K<sup>+</sup> excretion (mmol/24h/gBW). (G) Plasma aldosterone levels. (+/+ n=5-10, *Prss8<sup>cat/+</sup>* n=6-10, *Prss8<sup>cat/cat</sup>*, n=5-7). (H) Rectal ΔPD<sub>amil</sub> (mV) measurements reflecting ENaC activity in wild-type (black) and homozygous mutant (white circle) *Prss8<sup>cat/+</sup>* littermates in the distal colon following standard Na<sup>+</sup> (left panel) and low Na<sup>+</sup> diet (right panel). Results are presented as mean ± SEM, A,G,H were analyzed with a one-way ANOVA with a Tukey test. B-F were analyzed with a two-way ANOVA. P values <0.05 were considered statistically significant. \*\*\*P <0.001

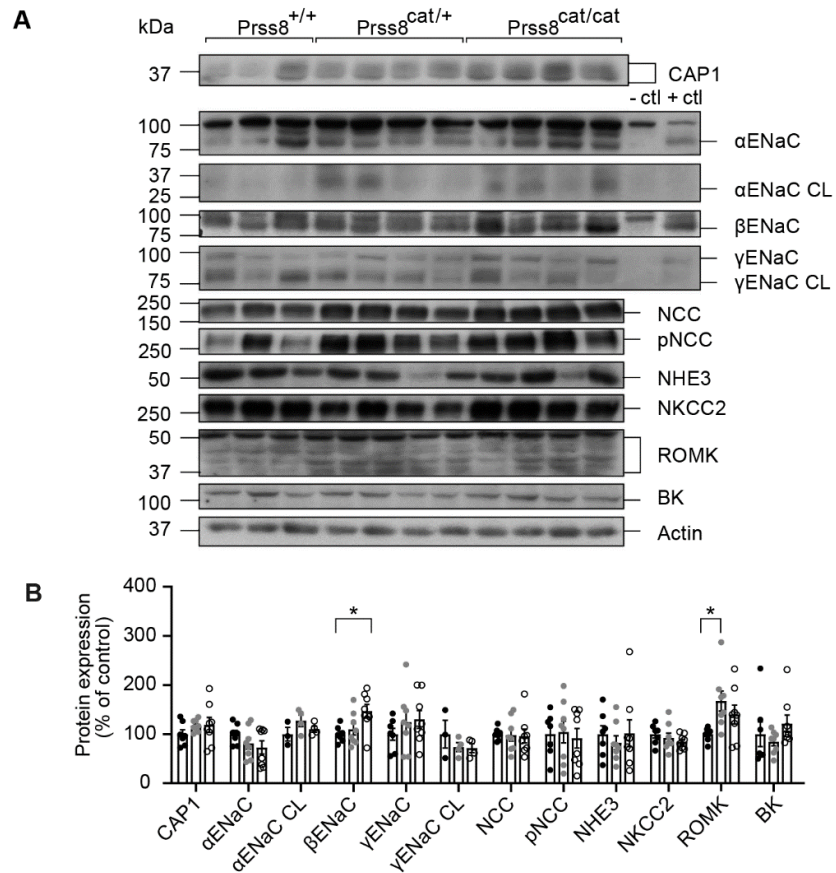

**Figure S5. Under low Na<sup>+</sup> diet, homozygous mutant *Prss8<sup>cat/cat</sup>* mice showed increased βENaC protein expression levels.** (A) Representative Western blot analyses of CAP1/*Prss8*, αENaC, αENaC CL (cleaved), βENaC, γENaC, γENaC CL (cleaved), NCC, pNCC (pT53-NCC), NHE3, NKCC2, ROMK and BK on kidney lysates from wild-type (+/+), heterozygous (*Prss8<sup>cat/+</sup>*) and homozygous mutant *Prss8<sup>cat/cat</sup>* (n=8 per genotype) littermates; β-actin was used as loading control. Kidney lysates from αENaC [9], βENaC and γENaC [7],[8] control and renal tubular-specific knockouts were used as negative (-ctl) and positive (+ctl) control. (B) Quantification of Western blots. Values are mean ± SEM and datasets were analyzed by a one-way ANOVA with a Tukey test. *P* values <0.05 were considered statistically significant. \**P*<0.05
